# Supplementary material for: Analysis of Cadmium Retention Mechanisms by a Smectite Clay in the Presence of Carbonates
Source: MDPI journal article supplement (doi:10.3390/toxics11020130), 2023-01-29
Supplement: s1 [file s1]

# Supplementary Materials: Analysis of Cadmium Retention Mechanisms by a Smectite Clay in the Presence of Carbonates

Tiziana Missana, Ursula Alonso, Natalia Mayordomo and Miguel García-Gutiérrez

**Table S1.** Parameters used to simulate each experimental curve, presented in Figure 3 and Figure 4.

| TEST                | X2Cd | SOwCd[+] | SOsCd[+] | SOwCd[2+] | SOsCd[2+] | SOsCdOH | SOwCdOH |
|---------------------|------|----------|----------|-----------|-----------|---------|---------|
| EDGE, 0.1 M Low Cd  | 3.50 | -2.50    | -1.40    | 4.30      | 6.10      | -11.70  | -11.90  |
| EDGE, 0.01 M Low Cd | 3.70 | -2.55    | -1.40    | 4.10      | 6.10      | -11.50  | -11.70  |
| EDGE, 0.1 M High Cd | 3.30 | -2.50    | -1.40    | 4.10      | 6.10      | -11.70  | -11.90  |
| IT, 0.1 M pH=7.8    | 3.60 | -2.50    | -1.40    | 4.10      | 6.10      | -11.70  | -11.90  |
| IT, 0.1 M pH=5.2    | 3.40 | -2.50    | -1.40    | 4.10      | 6.10      | -11.70  | -11.90  |
| MEAN                | 3.50 | -2.51    | -1.40    | 4.14      | 6.10      | -11.66  | -11.86  |
| Desvest             | 0.16 | 0.02     | 0.00     | 0.09      | 0.00      | 0.09    | 0.09    |

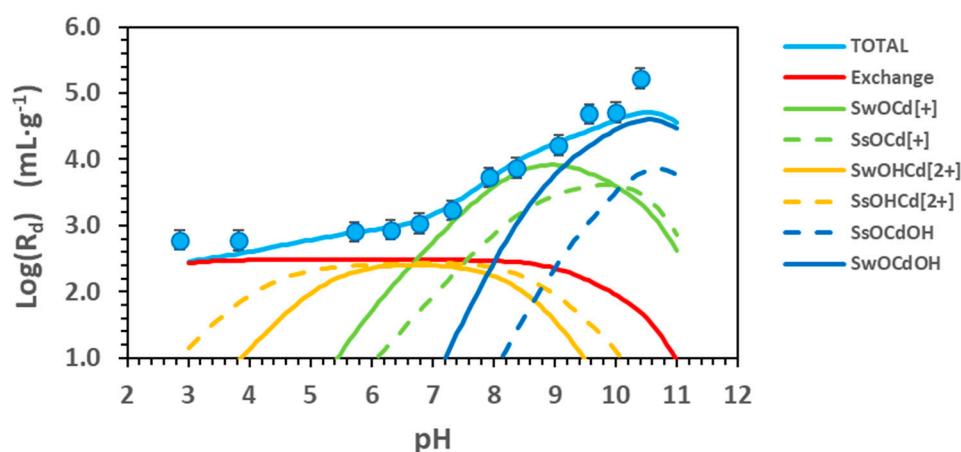

**Figure S1.** Contribution to the final adsorption of the different surface species for the data in Figure 2b.

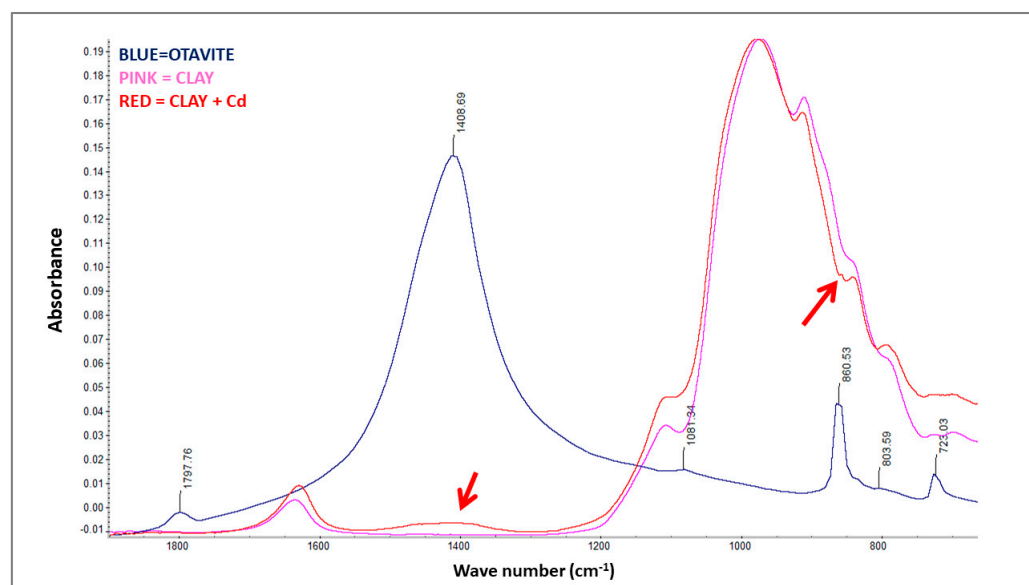

**Figure S2.** Comparison of the ATR-FTIR spectra of Na-smectite before and after the adsorption of Cd [ $3 \cdot 10^{-3}$  M] at pH=8 in NaClO<sub>4</sub> 0.01 M. The reference spectra of otavite is also included for comparison.
